# Supplementary material for: Urine based near-infrared spectroscopy analysis reveals a noninvasive and convenient diagnosis method for cancers: a pilot study
Source: PeerJ. 2023 Aug 31;11:e15895. doi: 10.7717/peerj.15895 (PMC10475272; doi:10.7717/peerj.15895)
Supplement: Supplemental Information 6 [file peerj-11-15895-s006.xlsx]

## Sheet: Sheet1
Ranking	Wavenumber
1	7339.74
2	7467.02
3	7343.6
4	4053.64
5	7470.88
6	7474.74
7	7328.17
8	5800.83
9	5561.7
10	7478.59
11	7324.32
12	7490.16
13	7494.02
14	4049.78
15	7308.89
16	7189.32
17	7231.75
18	7112.19
19	7243.32
20	7193.18
21	7463.17
22	7347.46
23	7497.88
24	5607.98
25	5445.99
26	5796.97
27	5611.84
28	5411.28
29	5418.99
30	4015.07
31	5442.13
32	7501.74
33	7378.31
34	7505.59
35	5615.7
36	5804.68
37	5399.71
38	5341.85
39	5492.27
40	7482.45
41	4126.92
42	7312.75
43	7517.16
44	5604.12
45	7521.02
46	7208.61
47	7227.89
48	5808.54
49	7355.17
50	7486.31
51	5338
52	7513.31
53	4651.46
54	10001
55	5430.56
56	5619.55
57	7455.45
58	7197.04
59	7447.74
60	5785.4
61	7451.6
62	7382.17
63	7459.31
64	7351.32
65	7509.45
66	5623.41
67	5781.54
68	7293.46
69	4678.46
70	7532.59
71	7536.45
72	9997.17
73	5345.71
74	7239.46
75	7108.33
76	7528.73
77	5627.27
78	5631.12
79	6992.62
80	6363.94
81	5580.98
82	5488.42
83	7374.46
84	7524.88
85	7540.3
86	5634.98
87	7366.74
88	7544.16
89	7305.03
90	5187.58
91	6826.77
92	5403.56
93	7104.47
94	5334.14
95	4690.03
96	7548.02
97	5588.7
98	5307.14
99	5183.72
100	7551.88
101	5426.71
102	5812.4
103	5638.84
104	7555.73
105	7359.03
106	7559.59
107	4848.17
108	5646.55
109	5773.83
110	5577.13
111	5434.42
112	7004.19
113	7092.9
114	9985.6
115	6367.8
116	7563.45
117	5584.84
118	5769.97
119	6016.82
120	5349.57
121	5172.15
122	5472.99
123	7567.3
124	5777.69
125	5642.69
126	7212.47
127	7035.05
128	7150.75
129	5203
130	7116.04
131	7031.19
132	6012.96
133	5766.12
134	7362.89
135	5565.55
136	5650.41
137	5461.42
138	5480.7
139	7443.88
140	7297.32
141	7571.16
142	5816.26
143	5654.26
144	5465.27
145	6356.23
146	5820.11
147	6009.1
148	7289.6
149	5592.55
150	6969.48
151	5843.25
152	6626.21
153	6923.2
154	5422.85
155	6020.67
156	7575.02
157	7089.04
158	8813.09
159	5823.97
160	7432.31
161	5669.69
162	5793.11
163	5658.12
164	5199.15
165	7015.76
166	7154.61
167	5438.28
168	7335.89
169	5557.84
170	5476.85
171	7181.61
172	5353.42
173	7578.87
174	5168.29
175	5673.55
176	5839.4
177	7440.02
178	7370.6
179	7582.73
180	5847.11
181	6005.25
182	6830.63
183	7185.47
184	9989.46
185	5326.42
186	7586.59
187	5854.82
188	4821.17
189	5681.26
190	7590.44
191	5850.97
192	5677.41
193	7166.18
194	7594.3
195	6888.48
196	7000.33
197	5191.43
198	5827.83
199	5665.84
200	7146.9
201	7598.16
202	5831.68
203	5330.28
204	5542.41
205	5156.72
206	5449.85
207	6024.53
208	7085.19
209	6375.51
210	5789.26
211	7605.87
212	5685.12
213	9993.31
214	4825.02
215	7609.73
216	5762.26
217	5688.98
218	5835.54
219	7008.05
220	7602.02
221	5661.98
222	7096.76
223	5037.15
224	6587.64
225	6622.35
226	7258.75
227	5858.68
228	5692.83
229	6028.39
230	5877.97
231	5118.15
232	7613.59
233	7173.9
234	5041.01
235	5526.99
236	6973.34
237	5507.7
238	5573.27
239	6379.37
240	5862.54
241	7617.44
242	8909.52
243	4813.45
244	6695.64
245	7235.61
246	6001.39
247	5303.28
248	5195.29
249	5874.11
250	7436.17
251	7428.45
252	7320.46
253	5866.4
254	8165.13
255	9981.74
256	5600.27
257	6032.24
258	5881.82
259	5179.86
260	8188.27
261	7139.18
262	6383.22
263	6468.08
264	8168.98
265	7332.03
266	7050.47
267	6892.34
268	6653.21
269	6676.35
270	5696.69
271	6036.1
272	8192.13
273	9977.89
274	5893.39
275	8176.7
276	6344.66
277	5210.72
278	5257
279	5176
280	5997.53
281	5870.25
282	8172.84
283	9974.03
284	5145.15
285	8203.7
286	5376.57
287	6039.96
288	7621.3
289	5889.54
290	5700.55
291	5758.4
292	5122.01
293	6792.06
294	8161.27
295	9970.17
296	7386.03
297	6352.37
298	8153.56
299	4817.31
300	7143.04
301	7131.47
302	5260.86
303	5160.58
304	8149.7
305	6043.81
306	5897.25
307	5704.4
308	7247.18
309	7625.16
310	5885.68
311	8157.41
312	9966.32
313	7393.74
314	5596.41
315	6583.79
316	5033.3
317	8195.98
318	7266.46
319	6657.07
320	6946.34
321	9954.75
322	8207.55
323	5708.26
324	5901.11
325	5993.67
326	5152.86
327	7629.01
328	6780.49
329	6873.06
330	7119.9
331	4693.89
332	7389.88
333	8145.84
334	6360.08
335	7278.03
336	8184.41
337	8809.24
338	8226.84
339	7424.6
340	9958.6
341	5754.54
342	8199.84
343	6047.67
344	5372.71
345	4836.59
346	5569.41
347	5496.13
348	8222.98
349	8882.52
350	8230.7
351	5137.44
352	7636.73
353	7224.04
354	6606.93
355	9943.17
356	8180.56
357	5904.97
358	5149.01
359	7316.6
360	5311
361	8215.27
362	6564.5
363	6529.79
364	5114.29
365	8234.55
366	9947.03
367	4852.02
368	4431.62
369	5530.84
370	6552.93
371	7038.9
372	8238.41
373	6329.23
374	5469.13
375	7632.87
376	8249.98
377	9931.6
378	5318.71
379	5989.82
380	6730.35
381	4601.32
382	6738.06
383	5264.71
384	7640.59
385	7301.17
386	4123.06
387	4296.62
388	8130.42
389	8905.66
390	8246.12
391	6784.35
392	6641.64
393	6954.05
394	7019.62
395	4285.05
396	4335.19
397	7270.32
398	8211.41
399	8219.13
400	8913.37
401	7162.33
402	6618.5
403	5164.43
404	8134.27
405	8886.37
406	5291.71
407	5457.56
408	8126.56
409	7054.33
410	4666.89
411	8242.27
412	6333.08
413	6522.07
414	8897.95
415	8138.13
416	7100.61
417	9912.32
418	8141.99
419	4142.35
420	5712.12
421	5908.82
422	6915.48
423	6711.06
424	5287.86
425	4747.88
426	6660.92
427	6610.78
428	4655.32
429	4450.9
430	8292.41
431	7254.89
432	5742.97
433	7011.9
434	7081.33
435	4940.73
436	5985.96
437	8253.84
438	9950.89
439	8118.84
440	7644.44
441	4643.75
442	5519.27
443	8311.69
444	4512.61
445	6691.78
446	4855.88
447	5920.39
448	8122.7
449	6051.53
450	6140.24
451	6387.08
452	9927.75
453	8296.26
454	4458.61
455	4736.31
456	5750.69
457	5133.58
458	5276.28
459	8315.55
460	4682.32
461	4138.49
462	9893.03
463	8273.12
464	4362.19
465	6977.19
466	4069.06
467	8924.94
468	4674.6
469	5407.42
470	5388.14
471	4462.47
472	8288.55
473	5322.57
474	7027.33
475	8276.98
476	7062.05
477	6518.22
478	6483.51
479	5415.13
480	5453.7
481	9908.46
482	4898.31
483	5206.86
484	6849.91
485	6811.34
486	6603.07
487	6741.92
488	6988.76
489	4663.03
490	4508.76
491	8284.69
492	4647.6
493	5253.14
494	4944.59
495	8307.83
496	4466.33
497	5746.83
498	8261.55
499	4844.31
500	6144.09
501	9935.46
502	8280.84
503	4894.45
504	5924.25
505	5982.1
506	6876.91
507	4130.78
508	6965.62
509	4072.92
510	6714.92
511	8300.12
512	5916.54
513	9939.32
514	8265.41
515	6630.07
516	6402.51
517	6055.39
518	6120.95
519	8334.83
520	4913.73
521	8867.09
522	8350.26
523	4809.6
524	6927.05
525	8269.27
526	7648.3
527	9869.89
528	7285.75
529	4639.89
530	4728.6
531	5141.29
532	4454.76
533	8319.41
534	4948.45
535	4184.77
536	6807.49
537	8257.69
538	6687.92
539	8901.8
540	8346.4
541	9889.18
542	5715.98
543	5928.11
544	4246.48
545	7397.6
546	8323.26
547	8303.98
548	4161.63
549	4686.17
550	7127.61
551	9881.46
552	6749.63
553	8338.69
554	6907.77
555	7652.16
556	8327.12
557	7200.89
558	4782.6
559	7077.47
560	6726.49
561	8330.98
562	6745.78
563	7656.01
564	8816.95
565	4427.76
566	4045.92
567	6371.65
568	6699.49
569	8936.51
570	4350.62
571	8342.55
572	4620.61
573	9916.18
574	8361.83
575	9858.32
576	8354.12
577	4670.75
578	8114.99
579	4377.62
580	7659.87
581	4963.87
582	4751.74
583	6834.49
584	6147.95
585	6865.34
586	5739.12
587	7405.31
588	8955.8
589	5499.99
590	4188.63
591	4065.21
592	8357.97
593	6059.24
594	6869.2
595	6136.38
596	5931.96
597	9835.18
598	7073.62
599	6498.93
600	6452.65
601	5978.25
602	5912.68
603	8111.13
604	5719.83
605	4744.03
606	8365.69
607	9854.46
608	6996.48
609	8091.85
610	8951.94
611	5935.82
612	5222.29
613	8107.27
614	7416.88
615	4003.5
616	6325.37
617	8095.7
618	6614.64
619	6857.63
620	7274.18
621	9873.75
622	6884.63
623	8099.56
624	8369.55
625	8917.23
626	6919.34
627	6846.06
628	8103.42
629	9715.62
630	7663.73
631	8080.28
632	4971.59
633	4150.06
634	8373.4
635	9711.76
636	4042.07
637	4292.77
638	6533.65
639	4389.19
640	4570.47
641	8087.99
642	6348.51
643	6541.36
644	5102.72
645	8072.56
646	4952.3
647	4987.01
648	9877.61
649	8076.42
650	4250.34
651	8381.12
652	6765.06
653	9839.04
654	8377.26
655	4366.05
656	6788.2
657	8084.13
658	8928.8
659	9700.19
660	8747.52
661	8384.97
662	6456.51
663	6495.08
664	5361.14
665	4254.2
666	8068.7
667	4863.59
668	8851.66
669	8708.96
670	7023.48
671	9866.04
672	6124.81
673	8064.85
674	5284
675	8940.37
676	8392.69
677	4308.19
678	7158.47
679	4967.73
680	4585.89
681	4238.77
682	6063.1
683	9707.9
684	7675.3
685	6911.62
686	8388.83
687	7401.46
688	8932.66
689	6105.53
690	4936.87
691	8060.99
692	9808.18
693	8053.28
694	6556.79
695	6903.91
696	5484.56
697	6684.07
698	6576.07
699	6815.2
700	8751.38
701	9812.04
702	4794.17
703	8057.13
704	7123.76
705	4867.45
706	7046.62
707	5245.43
708	7281.89
709	6984.91
710	5974.39
711	8396.54
712	9696.33
713	4531.9
714	5503.84
715	5939.68
716	8049.42
717	6549.07
718	6703.35
719	4435.47
720	4304.34
721	4346.76
722	9823.61
723	8400.4
724	6340.8
725	8041.71
726	4558.9
727	6117.1
728	6066.96
729	9785.04
730	4755.6
731	8045.56
732	5052.58
733	4975.44
734	5006.3
735	5241.57
736	5106.58
737	8037.85
738	8404.26
739	6900.05
740	4624.46
741	4146.2
742	7671.44
743	6930.91
744	4659.18
745	4497.18
746	8948.09
747	8863.23
748	6113.24
749	4342.91
750	7679.15
751	8878.66
752	6460.36
753	7667.58
754	8408.11
755	9673.19
756	8033.99
757	4759.46
758	5272.43
759	9580.62
760	9704.04
761	8689.67
762	5218.43
763	4909.88
764	6464.22
765	5017.87
766	6070.81
767	8705.1
768	9781.18
769	6336.94
770	7683.01
771	8423.54
772	7065.9
773	5129.72
774	5384.28
775	6799.77
776	9653.9
777	8411.97
778	8643.39
779	9576.77
780	4057.49
781	8446.68
782	6680.21
783	9827.47
784	5029.44
785	9615.33
786	8450.54
787	6163.38
788	4111.49
789	8022.42
790	9719.47
791	8419.69
792	8921.09
793	8743.67
794	4551.18
795	5110.44
796	8465.97
797	9599.91
798	5357.28
799	8647.24
800	9669.33
801	8427.4
802	8967.37
803	7686.87
804	8755.24
805	9677.05
806	8597.1
807	4369.91
808	4200.2
809	9561.34
810	8435.11
811	8026.28
812	6950.19
813	9646.19
814	8431.26
815	4327.48
816	8030.14
817	4740.17
818	9603.76
819	4300.48
820	5511.56
821	4539.61
822	4288.91
823	8018.56
824	9815.9
825	5095.01
826	4030.5
827	3999.64
828	8442.83
829	9773.47
830	6109.38
831	8774.52
832	8415.83
833	5546.27
834	6159.52
835	6074.67
836	9723.33
837	8670.39
838	9650.05
839	6672.49
840	8685.81
841	9607.62
842	6934.77
843	8438.97
844	7690.73
845	8469.83
846	9611.48
847	4412.33
848	9804.32
849	8612.53
850	4902.16
851	8801.52
852	8658.82
853	9904.6
854	8477.54
855	6487.36
856	6448.79
857	4859.74
858	4790.31
859	4547.32
860	6595.36
861	5970.53
862	4501.04
863	7262.61
864	9738.76
865	6151.81
866	8006.99
867	8631.82
868	9619.19
869	4103.78
870	4840.45
871	4767.17
872	8454.4
873	9777.33
874	8010.85
875	8473.68
876	4535.75
877	9657.76
878	8608.68
879	6938.62
880	9638.48
881	4956.16
882	5226.14
883	4778.74
884	8778.38
885	9680.9
886	4447.04
887	8014.71
888	8543.11
889	8894.09
890	8639.53
891	6761.2
892	5214.57
893	8944.23
894	8481.4
895	5947.39
896	9507.34
897	4998.59
898	8512.25
899	9503.48
900	4416.19
901	4211.77
902	8759.1
903	9831.32
904	8527.68
905	6421.79
906	9819.75
907	8600.96
908	8701.24
909	9734.9
910	4373.76
911	4219.49
912	6410.22
913	8770.67
914	9538.2
915	7995.42
916	4609.04
917	9584.48
918	6572.21
919	6591.5
920	6537.5
921	6822.92
922	8462.11
923	9565.19
924	7698.44
925	7216.32
926	6128.67
927	9885.32
928	8508.4
929	4578.18
930	5943.53
931	5075.72
932	8593.25
933	9596.05
934	7694.58
935	5249.29
936	8959.66
937	8666.53
938	9572.91
939	8793.81
940	9592.19
941	8523.82
942	9484.2
943	4504.9
944	4354.48
945	6645.5
946	5230
947	7999.28
948	9642.33
949	6896.2
950	8681.96
951	6961.76
952	5002.44
953	8504.54
954	8589.39
955	5735.26
956	8963.51
957	4339.05
958	6768.92
959	8624.1
960	9588.34
961	8604.82
962	9511.2
963	6321.51
964	7702.3
965	8546.96
966	4169.34
967	4528.04
968	8500.68
969	6221.23
970	9692.47
971	9557.48
972	8585.53
973	8003.14
974	9634.62
975	8724.38
976	8496.82
977	4177.06
978	6155.67
979	4605.18
980	9688.62
981	4485.61
982	4520.33
983	9788.9
984	4038.21
985	8620.25
986	7991.57
987	9962.46
988	8485.25
989	8855.52
990	9534.34
991	8616.39
992	4890.59
993	8728.24
994	6525.93
995	9626.91
996	9488.06
997	8539.25
998	9569.05
999	8492.97
1000	6568.36
1001	9727.19
1002	8531.54
1003	8654.96
1004	5125.86
1005	7177.75
1006	9515.05
1007	8581.68
1008	6506.65
1009	7069.76
1010	9623.05
1011	7987.71
1012	9862.18
1013	4007.35
1014	8627.96
1015	6406.37
1016	9769.61
1017	8859.38
1018	8566.25
1019	8789.95
1020	7983.85
1021	8820.81
1022	4011.21
1023	4242.63
1024	4636.03
1025	4593.61
1026	6174.95
1027	8573.96
1028	9761.9
1029	5044.87
1030	8562.39
1031	9499.63
1032	8712.81
1033	4269.63
1034	8489.11
1035	9542.05
1036	4805.74
1037	8558.54
1038	9684.76
1039	8458.25
1040	9923.89
1041	8570.11
1042	7976.14
1043	9472.63
1044	8635.67
1045	9410.92
1046	4273.48
1047	8550.82
1048	4713.17
1049	7706.15
1050	8516.11
1051	9850.61
1052	8535.39
1053	9426.35
1054	9742.61
1055	7980
1056	8847.81
1057	6132.52
1058	5079.58
1059	8519.97
1060	4990.87
1061	5951.25
1062	8870.95
1063	8978.94
1064	4470.19
1065	8693.53
1066	6491.22
1067	9437.92
1068	7964.57
1069	9518.91
1070	6217.38
1071	9445.63
1072	7968.42
1073	4720.89
1074	8554.68
1075	7960.71
1076	4115.35
1077	8766.81
1078	9758.04
1079	6649.35
1080	9545.91
1081	8577.82
1082	7972.28
1083	9896.89
1084	9461.06
1085	9800.47
1086	9464.91
1087	8651.1
1088	7420.74
1089	5233.86
1090	7042.76
1091	8662.67
1092	9407.06
1093	9480.34
1094	4832.74
1095	4705.46
1096	9476.49
1097	6101.67
1098	7713.87
1099	5966.68
1100	9549.77
1101	9731.04
1102	9553.62
1103	6317.66
1104	8982.8
1105	8732.1
1106	4196.34
1107	7710.01
1108	9468.77
1109	8786.09
1110	4234.91
1111	9422.49
1112	6225.09
1113	4882.88
1114	6514.36
1115	7717.72
1116	6298.37
1117	9746.47
1118	5723.69
1119	6772.78
1120	4381.48
1121	9376.21
1122	6722.63
1123	4628.32
1124	9414.77
1125	9434.06
1126	6271.37
1127	6209.66
1128	9430.2
1129	4018.92
1130	4223.34
1131	7956.85
1132	9765.76
1133	9441.77
1134	9665.48
1135	6171.09
1136	4281.2
1137	5056.44
1138	9842.89
1139	6417.94
1140	9630.76
1141	5268.57
1142	4933.02
1143	4400.76
1144	6213.52
1145	9522.77
1146	9661.62
1147	9449.49
1148	4396.9
1149	6167.24
1150	6078.53
1151	4423.9
1152	4331.34
1153	9530.48
1154	9457.2
1155	4917.59
1156	5395.85
1157	5014.01
1158	9900.75
1159	6394.8
1160	6306.09
1161	9792.75
1162	4612.89
1163	9495.77
1164	7721.58
1165	9491.91
1166	5068.01
1167	9754.18
1168	5368.85
1169	8762.95
1170	9418.63
1171	4886.73
1172	9380.06
1173	8805.38
1174	7729.29
1175	5071.87
1176	6842.2
1177	4092.21
1178	6803.63
1179	4516.47
1180	7170.04
1181	7953
1182	6178.81
1183	6429.51
1184	9372.35
1185	7949.14
1186	9453.34
1187	9750.33
1188	9526.63
1189	7937.57
1190	9403.2
1191	4709.32
1192	9395.49
1193	4477.9
1194	8890.23
1195	8782.24
1196	7945.28
1197	6309.94
1198	9846.75
1199	7725.44
1200	6718.78
1201	9383.92
1202	9920.03
1203	8975.08
1204	7933.71
1205	7740.87
1206	4589.75
1207	4034.35
1208	8874.8
1209	7941.43
1210	4061.35
1211	6182.66
1212	6479.65
1213	8998.23
1214	9796.61
1215	7733.15
1216	4724.74
1217	4979.3
1218	9399.35
1219	4994.73
1220	5048.73
1221	6294.52
1222	9368.49
1223	5364.99
1224	9391.63
1225	9353.06
1226	7929.86
1227	4701.6
1228	7737.01
1229	7744.72
1230	4080.64
1231	9002.08
1232	5534.7
1233	4404.62
1234	9349.21
1235	4022.78
1236	5087.3
1237	9364.63
1238	5098.87
1239	6236.66
1240	9360.78
1241	6267.52
1242	4319.77
1243	9337.64
1244	7926
1245	9345.35
1246	8971.23
1247	6707.21
1248	7918.28
1249	6757.35
1250	9341.49
1251	4107.63
1252	7910.57
1253	9387.78
1254	7922.14
1255	9356.92
1256	5955.11
1257	7906.71
1258	4385.33
1259	6753.49
1260	4925.3
1261	9260.5
1262	4774.88
1263	9299.07
1264	8986.65
1265	9322.21
1266	6444.94
1267	8797.67
1268	4732.46
1269	7914.43
1270	5523.13
1271	9314.49
1272	8716.67
1273	6734.21
1274	7748.58
1275	4153.92
1276	9264.35
1277	9310.64
1278	8840.09
1279	9326.06
1280	4555.04
1281	4204.06
1282	6275.23
1283	4597.46
1284	9333.78
1285	9302.92
1286	7895.14
1287	9237.36
1288	7058.19
1289	5538.56
1290	8836.23
1291	7891.29
1292	9005.94
1293	5060.3
1294	8697.38
1295	4443.19
1296	9329.92
1297	4524.18
1298	5731.4
1299	9306.78
1300	6545.22
1301	7409.17
1302	5021.73
1303	9256.64
1304	7764.01
1305	5515.41
1306	7760.15
1307	9318.35
1308	5553.98
1309	6414.08
1310	7899
1311	6560.64
1312	8832.38
1313	7752.44
1314	5314.85
1315	7902.86
1316	6205.81
1317	5010.16
1318	4632.18
1319	6861.48
1320	6097.81
1321	6390.94
1322	8994.37
1323	7251.03
1324	9275.92
1325	4562.75
1326	9233.5
1327	8720.53
1328	7767.86
1329	9283.64
1330	7794.86
1331	9295.21
1332	6664.78
1333	4084.49
1334	8678.1
1335	4026.64
1336	9252.78
1337	4493.33
1338	7887.43
1339	4358.33
1340	9248.93
1341	9287.5
1342	7775.58
1343	7779.43
1344	5550.13
1345	9279.78
1346	9272.07
1347	7798.72
1348	4474.04
1349	9268.21
1350	7771.72
1351	6819.06
1352	6244.38
1353	9291.35
1354	4906.02
1355	6313.8
1356	8735.95
1357	9241.21
1358	7879.71
1359	4312.05
1360	4798.03
1361	7791.01
1362	7756.29
1363	7802.58
1364	6190.38
1365	6880.77
1366	4157.77
1367	6263.66
1368	9167.93
1369	9245.07
1370	7883.57
1371	5237.72
1372	7875.86
1373	4786.45
1374	4119.2
1375	5083.44
1376	8990.51
1377	4215.63
1378	9083.08
1379	6093.95
1380	9009.8
1381	7872
1382	7783.29
1383	4099.92
1384	7825.72
1385	9202.64
1386	9021.37
1387	4960.02
1388	6186.52
1389	6579.93
1390	6240.52
1391	7829.57
1392	4231.06
1393	9171.79
1394	9052.22
1395	9218.07
1396	9121.65
1397	4929.16
1398	7868.14
1399	7787.15
1400	9071.51
1401	5962.82
1402	7845
1403	7821.86
1404	4088.35
1405	6194.24
1406	4921.45
1407	8739.81
1408	9036.79
1409	9164.07
1410	9206.5
1411	6425.65
1412	5064.15
1413	7848.86
1414	7806.43
1415	9179.5
1416	9086.94
1417	9175.64
1418	9106.22
1419	9048.37
1420	9075.36
1421	4489.47
1422	4076.78
1423	7841.15
1424	7864.29
1425	9156.36
1426	9013.65
1427	9229.64
1428	6398.65
1429	8828.52
1430	7852.72
1431	9098.51
1432	9214.21
1433	8674.24
1434	9044.51
1435	9025.22
1436	4173.2
1437	9032.94
1438	9110.08
1439	4566.61
1440	6957.91
1441	9133.22
1442	4697.74
1443	9160.22
1444	9102.36
1445	8843.95
1446	4439.33
1447	7833.43
1448	4227.2
1449	6279.09
1450	9210.36
1451	9056.08
1452	4717.03
1453	7818
1454	9079.22
1455	9040.65
1456	5280.14
1457	9152.5
1458	4207.91
1459	4180.92
1460	9148.65
1461	7810.29
1462	9029.08
1463	9198.79
1464	9137.08
1465	4828.88
1466	9125.5
1467	9090.79
1468	9183.36
1469	9221.93
1470	6853.77
1471	9194.93
1472	6441.08
1473	7814.15
1474	5025.58
1475	4134.63
1476	7860.43
1477	9191.07
1478	7837.29
1479	9067.65
1480	9129.36
1481	5380.42
1482	9017.51
1483	4277.34
1484	7135.33
1485	9113.93
1486	9144.79
1487	7856.57
1488	5091.15
1489	6228.95
1490	5391.99
1491	6981.05
1492	4165.49
1493	6090.1
1494	5295.57
1495	9187.22
1496	9094.65
1497	4771.03
1498	7204.75
1499	9225.78
1500	9117.79
1501	6232.8
1502	4420.05
1503	4763.31
1504	9059.94
1505	6599.21
1506	6290.66
1507	4393.05
1508	5727.55
1509	4481.76
1510	6838.34
1511	4408.47
1512	9140.93
1513	6198.09
1514	6201.95
1515	4616.75
1516	4543.47
1517	4261.91
1518	5299.43
1519	4582.04
1520	6475.79
1521	7413.03
1522	9063.79
1523	4871.31
1524	6282.94
1525	6086.24
1526	4096.06
1527	6471.93
1528	6502.79
1529	6255.95
1530	6942.48
1531	6252.09
1532	4875.16
1533	6286.8
1534	6433.36
1535	4879.02
1536	4983.16
1537	6248.23
1538	4192.49
1539	6259.8
1540	6633.93
1541	4323.62
1542	6082.38
1543	7220.18
1544	4265.77
1545	6637.78
1546	6776.63
1547	4801.88
1548	5958.96
1549	4315.91
1550	6302.23
1551	4258.05
1552	8824.66
1553	6668.64
1554	6437.22
1555	6795.92
1556	4574.32
1557	6510.5
