# Supplementary material for: Urine based near-infrared spectroscopy analysis reveals a noninvasive and convenient diagnosis method for cancers: a pilot study
Source: PeerJ. 2023 Aug 31;11:e15895. doi: 10.7717/peerj.15895 (PMC10475272; doi:10.7717/peerj.15895)
Supplement: Supplemental Information 7 [file peerj-11-15895-s007.xlsx]

## Sheet: Sheet1
Table S5: Top 262 NIRS features in SVM model
Rank	Wavenumber(1/cm)	Band assigment	Vibration mode
1	7339.74	Band II (8500 ~ 5500 cm-1)	The first harmonic overtones and their combinations of C-H/O-H/N-H stretching
2	7467.02	Band II (8500 ~ 5500 cm-1)	The first harmonic overtones and their combinations of C-H/O-H/N-H stretching
3	7343.6	Band II (8500 ~ 5500 cm-1)	The first harmonic overtones and their combinations of C-H/O-H/N-H stretching
4	4053.64	Band III (5500 ~ 4000 cm-1)	The combinations of harmonic overtones of C-H/O-H/N-H stretching, and the second overtones of C=O stretching
5	7470.88	Band II (8500 ~ 5500 cm-1)	The first harmonic overtones and their combinations of C-H/O-H/N-H stretching
6	7474.74	Band II (8500 ~ 5500 cm-1)	The first harmonic overtones and their combinations of C-H/O-H/N-H stretching
7	7328.17	Band II (8500 ~ 5500 cm-1)	The first harmonic overtones and their combinations of C-H/O-H/N-H stretching
8	5800.83	Band II (8500 ~ 5500 cm-1)	The first harmonic overtones and their combinations of C-H/O-H/N-H stretching
9	5561.7	Band II (8500 ~ 5500 cm-1)	The first harmonic overtones and their combinations of C-H/O-H/N-H stretching
10	7478.59	Band II (8500 ~ 5500 cm-1)	The first harmonic overtones and their combinations of C-H/O-H/N-H stretching
11	7324.32	Band II (8500 ~ 5500 cm-1)	The first harmonic overtones and their combinations of C-H/O-H/N-H stretching
12	7490.16	Band II (8500 ~ 5500 cm-1)	The first harmonic overtones and their combinations of C-H/O-H/N-H stretching
13	7494.02	Band II (8500 ~ 5500 cm-1)	The first harmonic overtones and their combinations of C-H/O-H/N-H stretching
14	4049.78	Band III (5500 ~ 4000 cm-1)	The combinations of harmonic overtones of C-H/O-H/N-H stretching, and the second overtones of C=O stretching
15	7308.89	Band II (8500 ~ 5500 cm-1)	The first harmonic overtones and their combinations of C-H/O-H/N-H stretching
16	7189.32	Band II (8500 ~ 5500 cm-1)	The first harmonic overtones and their combinations of C-H/O-H/N-H stretching
17	7231.75	Band II (8500 ~ 5500 cm-1)	The first harmonic overtones and their combinations of C-H/O-H/N-H stretching
18	7112.19	Band II (8500 ~ 5500 cm-1)	The first harmonic overtones and their combinations of C-H/O-H/N-H stretching
19	7243.32	Band II (8500 ~ 5500 cm-1)	The first harmonic overtones and their combinations of C-H/O-H/N-H stretching
20	7193.18	Band II (8500 ~ 5500 cm-1)	The first harmonic overtones and their combinations of C-H/O-H/N-H stretching
21	7463.17	Band II (8500 ~ 5500 cm-1)	The first harmonic overtones and their combinations of C-H/O-H/N-H stretching
22	7347.46	Band II (8500 ~ 5500 cm-1)	The first harmonic overtones and their combinations of C-H/O-H/N-H stretching
23	7497.88	Band II (8500 ~ 5500 cm-1)	The first harmonic overtones and their combinations of C-H/O-H/N-H stretching
24	5607.98	Band II (8500 ~ 5500 cm-1)	The first harmonic overtones and their combinations of C-H/O-H/N-H stretching
25	5445.99	Band III (5500 ~ 4000 cm-1)	The combinations of harmonic overtones of C-H/O-H/N-H stretching, and the second overtones of C=O stretching
26	5796.97	Band II (8500 ~ 5500 cm-1)	The first harmonic overtones and their combinations of C-H/O-H/N-H stretching
27	5611.84	Band II (8500 ~ 5500 cm-1)	The first harmonic overtones and their combinations of C-H/O-H/N-H stretching
28	5411.28	Band III (5500 ~ 4000 cm-1)	The combinations of harmonic overtones of C-H/O-H/N-H stretching, and the second overtones of C=O stretching
29	5418.99	Band III (5500 ~ 4000 cm-1)	The combinations of harmonic overtones of C-H/O-H/N-H stretching, and the second overtones of C=O stretching
30	4015.07	Band III (5500 ~ 4000 cm-1)	The combinations of harmonic overtones of C-H/O-H/N-H stretching, and the second overtones of C=O stretching
31	5442.13	Band III (5500 ~ 4000 cm-1)	The combinations of harmonic overtones of C-H/O-H/N-H stretching, and the second overtones of C=O stretching
32	7501.74	Band II (8500 ~ 5500 cm-1)	The first harmonic overtones and their combinations of C-H/O-H/N-H stretching
33	7378.31	Band II (8500 ~ 5500 cm-1)	The first harmonic overtones and their combinations of C-H/O-H/N-H stretching
34	7505.59	Band II (8500 ~ 5500 cm-1)	The first harmonic overtones and their combinations of C-H/O-H/N-H stretching
35	5615.7	Band II (8500 ~ 5500 cm-1)	The first harmonic overtones and their combinations of C-H/O-H/N-H stretching
36	5804.68	Band II (8500 ~ 5500 cm-1)	The first harmonic overtones and their combinations of C-H/O-H/N-H stretching
37	5399.71	Band III (5500 ~ 4000 cm-1)	The combinations of harmonic overtones of C-H/O-H/N-H stretching, and the second overtones of C=O stretching
38	5341.85	Band III (5500 ~ 4000 cm-1)	The combinations of harmonic overtones of C-H/O-H/N-H stretching, and the second overtones of C=O stretching
39	5492.27	Band III (5500 ~ 4000 cm-1)	The combinations of harmonic overtones of C-H/O-H/N-H stretching, and the second overtones of C=O stretching
40	7482.45	Band II (8500 ~ 5500 cm-1)	The first harmonic overtones and their combinations of C-H/O-H/N-H stretching
41	4126.92	Band III (5500 ~ 4000 cm-1)	The combinations of harmonic overtones of C-H/O-H/N-H stretching, and the second overtones of C=O stretching
42	7312.75	Band II (8500 ~ 5500 cm-1)	The first harmonic overtones and their combinations of C-H/O-H/N-H stretching
43	7517.16	Band II (8500 ~ 5500 cm-1)	The first harmonic overtones and their combinations of C-H/O-H/N-H stretching
44	5604.12	Band II (8500 ~ 5500 cm-1)	The first harmonic overtones and their combinations of C-H/O-H/N-H stretching
45	7521.02	Band II (8500 ~ 5500 cm-1)	The first harmonic overtones and their combinations of C-H/O-H/N-H stretching
46	7208.61	Band II (8500 ~ 5500 cm-1)	The first harmonic overtones and their combinations of C-H/O-H/N-H stretching
47	7227.89	Band II (8500 ~ 5500 cm-1)	The first harmonic overtones and their combinations of C-H/O-H/N-H stretching
48	5808.54	Band II (8500 ~ 5500 cm-1)	The first harmonic overtones and their combinations of C-H/O-H/N-H stretching
49	7355.17	Band II (8500 ~ 5500 cm-1)	The first harmonic overtones and their combinations of C-H/O-H/N-H stretching
50	7486.31	Band II (8500 ~ 5500 cm-1)	The first harmonic overtones and their combinations of C-H/O-H/N-H stretching
51	5338	Band III (5500 ~ 4000 cm-1)	The combinations of harmonic overtones of C-H/O-H/N-H stretching, and the second overtones of C=O stretching
52	7513.31	Band II (8500 ~ 5500 cm-1)	The first harmonic overtones and their combinations of C-H/O-H/N-H stretching
53	4651.46	Band III (5500 ~ 4000 cm-1)	The combinations of harmonic overtones of C-H/O-H/N-H stretching, and the second overtones of C=O stretching
54	10001	Band I (12500 ~ 8500 cm-1)	The second and third harmonic overtones and their combinations of C-H/O-H/N-H stretching
55	5430.56	Band III (5500 ~ 4000 cm-1)	The combinations of harmonic overtones of C-H/O-H/N-H stretching, and the second overtones of C=O stretching
56	5619.55	Band II (8500 ~ 5500 cm-1)	The first harmonic overtones and their combinations of C-H/O-H/N-H stretching
57	7455.45	Band II (8500 ~ 5500 cm-1)	The first harmonic overtones and their combinations of C-H/O-H/N-H stretching
58	7197.04	Band II (8500 ~ 5500 cm-1)	The first harmonic overtones and their combinations of C-H/O-H/N-H stretching
59	7447.74	Band II (8500 ~ 5500 cm-1)	The first harmonic overtones and their combinations of C-H/O-H/N-H stretching
60	5785.4	Band II (8500 ~ 5500 cm-1)	The first harmonic overtones and their combinations of C-H/O-H/N-H stretching
61	7451.6	Band II (8500 ~ 5500 cm-1)	The first harmonic overtones and their combinations of C-H/O-H/N-H stretching
62	7382.17	Band II (8500 ~ 5500 cm-1)	The first harmonic overtones and their combinations of C-H/O-H/N-H stretching
63	7459.31	Band II (8500 ~ 5500 cm-1)	The first harmonic overtones and their combinations of C-H/O-H/N-H stretching
64	7351.32	Band II (8500 ~ 5500 cm-1)	The first harmonic overtones and their combinations of C-H/O-H/N-H stretching
65	7509.45	Band II (8500 ~ 5500 cm-1)	The first harmonic overtones and their combinations of C-H/O-H/N-H stretching
66	5623.41	Band II (8500 ~ 5500 cm-1)	The first harmonic overtones and their combinations of C-H/O-H/N-H stretching
67	5781.54	Band II (8500 ~ 5500 cm-1)	The first harmonic overtones and their combinations of C-H/O-H/N-H stretching
68	7293.46	Band II (8500 ~ 5500 cm-1)	The first harmonic overtones and their combinations of C-H/O-H/N-H stretching
69	4678.46	Band III (5500 ~ 4000 cm-1)	The combinations of harmonic overtones of C-H/O-H/N-H stretching, and the second overtones of C=O stretching
70	7532.59	Band II (8500 ~ 5500 cm-1)	The first harmonic overtones and their combinations of C-H/O-H/N-H stretching
71	7536.45	Band II (8500 ~ 5500 cm-1)	The first harmonic overtones and their combinations of C-H/O-H/N-H stretching
72	9997.17	Band I (12500 ~ 8500 cm-1)	The second and third harmonic overtones and their combinations of C-H/O-H/N-H stretching
73	5345.71	Band III (5500 ~ 4000 cm-1)	The combinations of harmonic overtones of C-H/O-H/N-H stretching, and the second overtones of C=O stretching
74	7239.46	Band II (8500 ~ 5500 cm-1)	The first harmonic overtones and their combinations of C-H/O-H/N-H stretching
75	7108.33	Band II (8500 ~ 5500 cm-1)	The first harmonic overtones and their combinations of C-H/O-H/N-H stretching
76	7528.73	Band II (8500 ~ 5500 cm-1)	The first harmonic overtones and their combinations of C-H/O-H/N-H stretching
77	5627.27	Band II (8500 ~ 5500 cm-1)	The first harmonic overtones and their combinations of C-H/O-H/N-H stretching
78	5631.12	Band II (8500 ~ 5500 cm-1)	The first harmonic overtones and their combinations of C-H/O-H/N-H stretching
79	6992.62	Band II (8500 ~ 5500 cm-1)	The first harmonic overtones and their combinations of C-H/O-H/N-H stretching
80	6363.94	Band II (8500 ~ 5500 cm-1)	The first harmonic overtones and their combinations of C-H/O-H/N-H stretching
81	5580.98	Band II (8500 ~ 5500 cm-1)	The first harmonic overtones and their combinations of C-H/O-H/N-H stretching
82	5488.42	Band III (5500 ~ 4000 cm-1)	The combinations of harmonic overtones of C-H/O-H/N-H stretching, and the second overtones of C=O stretching
83	7374.46	Band II (8500 ~ 5500 cm-1)	The first harmonic overtones and their combinations of C-H/O-H/N-H stretching
84	7524.88	Band II (8500 ~ 5500 cm-1)	The first harmonic overtones and their combinations of C-H/O-H/N-H stretching
85	7540.3	Band II (8500 ~ 5500 cm-1)	The first harmonic overtones and their combinations of C-H/O-H/N-H stretching
86	5634.98	Band II (8500 ~ 5500 cm-1)	The first harmonic overtones and their combinations of C-H/O-H/N-H stretching
87	7366.74	Band II (8500 ~ 5500 cm-1)	The first harmonic overtones and their combinations of C-H/O-H/N-H stretching
88	7544.16	Band II (8500 ~ 5500 cm-1)	The first harmonic overtones and their combinations of C-H/O-H/N-H stretching
89	7305.03	Band II (8500 ~ 5500 cm-1)	The first harmonic overtones and their combinations of C-H/O-H/N-H stretching
90	5187.58	Band III (5500 ~ 4000 cm-1)	The combinations of harmonic overtones of C-H/O-H/N-H stretching, and the second overtones of C=O stretching
91	6826.77	Band II (8500 ~ 5500 cm-1)	The first harmonic overtones and their combinations of C-H/O-H/N-H stretching
92	5403.56	Band III (5500 ~ 4000 cm-1)	The combinations of harmonic overtones of C-H/O-H/N-H stretching, and the second overtones of C=O stretching
93	7104.47	Band II (8500 ~ 5500 cm-1)	The first harmonic overtones and their combinations of C-H/O-H/N-H stretching
94	5334.14	Band III (5500 ~ 4000 cm-1)	The combinations of harmonic overtones of C-H/O-H/N-H stretching, and the second overtones of C=O stretching
95	4690.03	Band III (5500 ~ 4000 cm-1)	The combinations of harmonic overtones of C-H/O-H/N-H stretching, and the second overtones of C=O stretching
96	7548.02	Band II (8500 ~ 5500 cm-1)	The first harmonic overtones and their combinations of C-H/O-H/N-H stretching
97	5588.7	Band II (8500 ~ 5500 cm-1)	The first harmonic overtones and their combinations of C-H/O-H/N-H stretching
98	5307.14	Band III (5500 ~ 4000 cm-1)	The combinations of harmonic overtones of C-H/O-H/N-H stretching, and the second overtones of C=O stretching
99	5183.72	Band III (5500 ~ 4000 cm-1)	The combinations of harmonic overtones of C-H/O-H/N-H stretching, and the second overtones of C=O stretching
100	7551.88	Band II (8500 ~ 5500 cm-1)	The first harmonic overtones and their combinations of C-H/O-H/N-H stretching
101	5426.71	Band III (5500 ~ 4000 cm-1)	The combinations of harmonic overtones of C-H/O-H/N-H stretching, and the second overtones of C=O stretching
102	5812.4	Band II (8500 ~ 5500 cm-1)	The first harmonic overtones and their combinations of C-H/O-H/N-H stretching
103	5638.84	Band II (8500 ~ 5500 cm-1)	The first harmonic overtones and their combinations of C-H/O-H/N-H stretching
104	7555.73	Band II (8500 ~ 5500 cm-1)	The first harmonic overtones and their combinations of C-H/O-H/N-H stretching
105	7359.03	Band II (8500 ~ 5500 cm-1)	The first harmonic overtones and their combinations of C-H/O-H/N-H stretching
106	7559.59	Band II (8500 ~ 5500 cm-1)	The first harmonic overtones and their combinations of C-H/O-H/N-H stretching
107	4848.17	Band III (5500 ~ 4000 cm-1)	The combinations of harmonic overtones of C-H/O-H/N-H stretching, and the second overtones of C=O stretching
108	5646.55	Band II (8500 ~ 5500 cm-1)	The first harmonic overtones and their combinations of C-H/O-H/N-H stretching
109	5773.83	Band II (8500 ~ 5500 cm-1)	The first harmonic overtones and their combinations of C-H/O-H/N-H stretching
110	5577.13	Band II (8500 ~ 5500 cm-1)	The first harmonic overtones and their combinations of C-H/O-H/N-H stretching
111	5434.42	Band III (5500 ~ 4000 cm-1)	The combinations of harmonic overtones of C-H/O-H/N-H stretching, and the second overtones of C=O stretching
112	7004.19	Band II (8500 ~ 5500 cm-1)	The first harmonic overtones and their combinations of C-H/O-H/N-H stretching
113	7092.9	Band II (8500 ~ 5500 cm-1)	The first harmonic overtones and their combinations of C-H/O-H/N-H stretching
114	9985.6	Band I (12500 ~ 8500 cm-1)	The second and third harmonic overtones and their combinations of C-H/O-H/N-H stretching
115	6367.8	Band II (8500 ~ 5500 cm-1)	The first harmonic overtones and their combinations of C-H/O-H/N-H stretching
116	7563.45	Band II (8500 ~ 5500 cm-1)	The first harmonic overtones and their combinations of C-H/O-H/N-H stretching
117	5584.84	Band II (8500 ~ 5500 cm-1)	The first harmonic overtones and their combinations of C-H/O-H/N-H stretching
118	5769.97	Band II (8500 ~ 5500 cm-1)	The first harmonic overtones and their combinations of C-H/O-H/N-H stretching
119	6016.82	Band II (8500 ~ 5500 cm-1)	The first harmonic overtones and their combinations of C-H/O-H/N-H stretching
120	5349.57	Band III (5500 ~ 4000 cm-1)	The combinations of harmonic overtones of C-H/O-H/N-H stretching, and the second overtones of C=O stretching
121	5172.15	Band III (5500 ~ 4000 cm-1)	The combinations of harmonic overtones of C-H/O-H/N-H stretching, and the second overtones of C=O stretching
122	5472.99	Band III (5500 ~ 4000 cm-1)	The combinations of harmonic overtones of C-H/O-H/N-H stretching, and the second overtones of C=O stretching
123	7567.3	Band II (8500 ~ 5500 cm-1)	The first harmonic overtones and their combinations of C-H/O-H/N-H stretching
124	5777.69	Band II (8500 ~ 5500 cm-1)	The first harmonic overtones and their combinations of C-H/O-H/N-H stretching
125	5642.69	Band II (8500 ~ 5500 cm-1)	The first harmonic overtones and their combinations of C-H/O-H/N-H stretching
126	7212.47	Band II (8500 ~ 5500 cm-1)	The first harmonic overtones and their combinations of C-H/O-H/N-H stretching
127	7035.05	Band II (8500 ~ 5500 cm-1)	The first harmonic overtones and their combinations of C-H/O-H/N-H stretching
128	7150.75	Band II (8500 ~ 5500 cm-1)	The first harmonic overtones and their combinations of C-H/O-H/N-H stretching
129	5203	Band III (5500 ~ 4000 cm-1)	The combinations of harmonic overtones of C-H/O-H/N-H stretching, and the second overtones of C=O stretching
130	7116.04	Band II (8500 ~ 5500 cm-1)	The first harmonic overtones and their combinations of C-H/O-H/N-H stretching
131	7031.19	Band II (8500 ~ 5500 cm-1)	The first harmonic overtones and their combinations of C-H/O-H/N-H stretching
132	6012.96	Band II (8500 ~ 5500 cm-1)	The first harmonic overtones and their combinations of C-H/O-H/N-H stretching
133	5766.12	Band II (8500 ~ 5500 cm-1)	The first harmonic overtones and their combinations of C-H/O-H/N-H stretching
134	7362.89	Band II (8500 ~ 5500 cm-1)	The first harmonic overtones and their combinations of C-H/O-H/N-H stretching
135	5565.55	Band II (8500 ~ 5500 cm-1)	The first harmonic overtones and their combinations of C-H/O-H/N-H stretching
136	5650.41	Band II (8500 ~ 5500 cm-1)	The first harmonic overtones and their combinations of C-H/O-H/N-H stretching
137	5461.42	Band III (5500 ~ 4000 cm-1)	The combinations of harmonic overtones of C-H/O-H/N-H stretching, and the second overtones of C=O stretching
138	5480.7	Band III (5500 ~ 4000 cm-1)	The combinations of harmonic overtones of C-H/O-H/N-H stretching, and the second overtones of C=O stretching
139	7443.88	Band II (8500 ~ 5500 cm-1)	The first harmonic overtones and their combinations of C-H/O-H/N-H stretching
140	7297.32	Band II (8500 ~ 5500 cm-1)	The first harmonic overtones and their combinations of C-H/O-H/N-H stretching
141	7571.16	Band II (8500 ~ 5500 cm-1)	The first harmonic overtones and their combinations of C-H/O-H/N-H stretching
142	5816.26	Band II (8500 ~ 5500 cm-1)	The first harmonic overtones and their combinations of C-H/O-H/N-H stretching
143	5654.26	Band II (8500 ~ 5500 cm-1)	The first harmonic overtones and their combinations of C-H/O-H/N-H stretching
144	5465.27	Band III (5500 ~ 4000 cm-1)	The combinations of harmonic overtones of C-H/O-H/N-H stretching, and the second overtones of C=O stretching
145	6356.23	Band II (8500 ~ 5500 cm-1)	The first harmonic overtones and their combinations of C-H/O-H/N-H stretching
146	5820.11	Band II (8500 ~ 5500 cm-1)	The first harmonic overtones and their combinations of C-H/O-H/N-H stretching
147	6009.1	Band II (8500 ~ 5500 cm-1)	The first harmonic overtones and their combinations of C-H/O-H/N-H stretching
148	7289.6	Band II (8500 ~ 5500 cm-1)	The first harmonic overtones and their combinations of C-H/O-H/N-H stretching
149	5592.55	Band II (8500 ~ 5500 cm-1)	The first harmonic overtones and their combinations of C-H/O-H/N-H stretching
150	6969.48	Band II (8500 ~ 5500 cm-1)	The first harmonic overtones and their combinations of C-H/O-H/N-H stretching
151	5843.25	Band II (8500 ~ 5500 cm-1)	The first harmonic overtones and their combinations of C-H/O-H/N-H stretching
152	6626.21	Band II (8500 ~ 5500 cm-1)	The first harmonic overtones and their combinations of C-H/O-H/N-H stretching
153	6923.2	Band II (8500 ~ 5500 cm-1)	The first harmonic overtones and their combinations of C-H/O-H/N-H stretching
154	5422.85	Band III (5500 ~ 4000 cm-1)	The combinations of harmonic overtones of C-H/O-H/N-H stretching, and the second overtones of C=O stretching
155	6020.67	Band II (8500 ~ 5500 cm-1)	The first harmonic overtones and their combinations of C-H/O-H/N-H stretching
156	7575.02	Band II (8500 ~ 5500 cm-1)	The first harmonic overtones and their combinations of C-H/O-H/N-H stretching
157	7089.04	Band II (8500 ~ 5500 cm-1)	The first harmonic overtones and their combinations of C-H/O-H/N-H stretching
158	8813.09	Band I (12500 ~ 8500 cm-1)	The second and third harmonic overtones and their combinations of C-H/O-H/N-H stretching
159	5823.97	Band II (8500 ~ 5500 cm-1)	The first harmonic overtones and their combinations of C-H/O-H/N-H stretching
160	7432.31	Band II (8500 ~ 5500 cm-1)	The first harmonic overtones and their combinations of C-H/O-H/N-H stretching
161	5669.69	Band II (8500 ~ 5500 cm-1)	The first harmonic overtones and their combinations of C-H/O-H/N-H stretching
162	5793.11	Band II (8500 ~ 5500 cm-1)	The first harmonic overtones and their combinations of C-H/O-H/N-H stretching
163	5658.12	Band II (8500 ~ 5500 cm-1)	The first harmonic overtones and their combinations of C-H/O-H/N-H stretching
164	5199.15	Band III (5500 ~ 4000 cm-1)	The combinations of harmonic overtones of C-H/O-H/N-H stretching, and the second overtones of C=O stretching
165	7015.76	Band II (8500 ~ 5500 cm-1)	The first harmonic overtones and their combinations of C-H/O-H/N-H stretching
166	7154.61	Band II (8500 ~ 5500 cm-1)	The first harmonic overtones and their combinations of C-H/O-H/N-H stretching
167	5438.28	Band III (5500 ~ 4000 cm-1)	The combinations of harmonic overtones of C-H/O-H/N-H stretching, and the second overtones of C=O stretching
168	7335.89	Band II (8500 ~ 5500 cm-1)	The first harmonic overtones and their combinations of C-H/O-H/N-H stretching
169	5557.84	Band II (8500 ~ 5500 cm-1)	The first harmonic overtones and their combinations of C-H/O-H/N-H stretching
170	5476.85	Band III (5500 ~ 4000 cm-1)	The combinations of harmonic overtones of C-H/O-H/N-H stretching, and the second overtones of C=O stretching
171	7181.61	Band II (8500 ~ 5500 cm-1)	The first harmonic overtones and their combinations of C-H/O-H/N-H stretching
172	5353.42	Band III (5500 ~ 4000 cm-1)	The combinations of harmonic overtones of C-H/O-H/N-H stretching, and the second overtones of C=O stretching
173	7578.87	Band II (8500 ~ 5500 cm-1)	The first harmonic overtones and their combinations of C-H/O-H/N-H stretching
174	5168.29	Band III (5500 ~ 4000 cm-1)	The combinations of harmonic overtones of C-H/O-H/N-H stretching, and the second overtones of C=O stretching
175	5673.55	Band II (8500 ~ 5500 cm-1)	The first harmonic overtones and their combinations of C-H/O-H/N-H stretching
176	5839.4	Band II (8500 ~ 5500 cm-1)	The first harmonic overtones and their combinations of C-H/O-H/N-H stretching
177	7440.02	Band II (8500 ~ 5500 cm-1)	The first harmonic overtones and their combinations of C-H/O-H/N-H stretching
178	7370.6	Band II (8500 ~ 5500 cm-1)	The first harmonic overtones and their combinations of C-H/O-H/N-H stretching
179	7582.73	Band II (8500 ~ 5500 cm-1)	The first harmonic overtones and their combinations of C-H/O-H/N-H stretching
180	5847.11	Band II (8500 ~ 5500 cm-1)	The first harmonic overtones and their combinations of C-H/O-H/N-H stretching
181	6005.25	Band II (8500 ~ 5500 cm-1)	The first harmonic overtones and their combinations of C-H/O-H/N-H stretching
182	6830.63	Band II (8500 ~ 5500 cm-1)	The first harmonic overtones and their combinations of C-H/O-H/N-H stretching
183	7185.47	Band II (8500 ~ 5500 cm-1)	The first harmonic overtones and their combinations of C-H/O-H/N-H stretching
184	9989.46	Band I (12500 ~ 8500 cm-1)	The second and third harmonic overtones and their combinations of C-H/O-H/N-H stretching
185	5326.42	Band III (5500 ~ 4000 cm-1)	The combinations of harmonic overtones of C-H/O-H/N-H stretching, and the second overtones of C=O stretching
186	7586.59	Band II (8500 ~ 5500 cm-1)	The first harmonic overtones and their combinations of C-H/O-H/N-H stretching
187	5854.82	Band II (8500 ~ 5500 cm-1)	The first harmonic overtones and their combinations of C-H/O-H/N-H stretching
188	4821.17	Band III (5500 ~ 4000 cm-1)	The combinations of harmonic overtones of C-H/O-H/N-H stretching, and the second overtones of C=O stretching
189	5681.26	Band II (8500 ~ 5500 cm-1)	The first harmonic overtones and their combinations of C-H/O-H/N-H stretching
190	7590.44	Band II (8500 ~ 5500 cm-1)	The first harmonic overtones and their combinations of C-H/O-H/N-H stretching
191	5850.97	Band II (8500 ~ 5500 cm-1)	The first harmonic overtones and their combinations of C-H/O-H/N-H stretching
192	5677.41	Band II (8500 ~ 5500 cm-1)	The first harmonic overtones and their combinations of C-H/O-H/N-H stretching
193	7166.18	Band II (8500 ~ 5500 cm-1)	The first harmonic overtones and their combinations of C-H/O-H/N-H stretching
194	7594.3	Band II (8500 ~ 5500 cm-1)	The first harmonic overtones and their combinations of C-H/O-H/N-H stretching
195	6888.48	Band II (8500 ~ 5500 cm-1)	The first harmonic overtones and their combinations of C-H/O-H/N-H stretching
196	7000.33	Band II (8500 ~ 5500 cm-1)	The first harmonic overtones and their combinations of C-H/O-H/N-H stretching
197	5191.43	Band III (5500 ~ 4000 cm-1)	The combinations of harmonic overtones of C-H/O-H/N-H stretching, and the second overtones of C=O stretching
198	5827.83	Band II (8500 ~ 5500 cm-1)	The first harmonic overtones and their combinations of C-H/O-H/N-H stretching
199	5665.84	Band II (8500 ~ 5500 cm-1)	The first harmonic overtones and their combinations of C-H/O-H/N-H stretching
200	7146.9	Band II (8500 ~ 5500 cm-1)	The first harmonic overtones and their combinations of C-H/O-H/N-H stretching
201	7598.16	Band II (8500 ~ 5500 cm-1)	The first harmonic overtones and their combinations of C-H/O-H/N-H stretching
202	5831.68	Band II (8500 ~ 5500 cm-1)	The first harmonic overtones and their combinations of C-H/O-H/N-H stretching
203	5330.28	Band III (5500 ~ 4000 cm-1)	The combinations of harmonic overtones of C-H/O-H/N-H stretching, and the second overtones of C=O stretching
204	5542.41	Band II (8500 ~ 5500 cm-1)	The first harmonic overtones and their combinations of C-H/O-H/N-H stretching
205	5156.72	Band III (5500 ~ 4000 cm-1)	The combinations of harmonic overtones of C-H/O-H/N-H stretching, and the second overtones of C=O stretching
206	5449.85	Band III (5500 ~ 4000 cm-1)	The combinations of harmonic overtones of C-H/O-H/N-H stretching, and the second overtones of C=O stretching
207	6024.53	Band II (8500 ~ 5500 cm-1)	The first harmonic overtones and their combinations of C-H/O-H/N-H stretching
208	7085.19	Band II (8500 ~ 5500 cm-1)	The first harmonic overtones and their combinations of C-H/O-H/N-H stretching
209	6375.51	Band II (8500 ~ 5500 cm-1)	The first harmonic overtones and their combinations of C-H/O-H/N-H stretching
210	5789.26	Band II (8500 ~ 5500 cm-1)	The first harmonic overtones and their combinations of C-H/O-H/N-H stretching
211	7605.87	Band II (8500 ~ 5500 cm-1)	The first harmonic overtones and their combinations of C-H/O-H/N-H stretching
212	5685.12	Band II (8500 ~ 5500 cm-1)	The first harmonic overtones and their combinations of C-H/O-H/N-H stretching
213	9993.31	Band I (12500 ~ 8500 cm-1)	The second and third harmonic overtones and their combinations of C-H/O-H/N-H stretching
214	4825.02	Band III (5500 ~ 4000 cm-1)	The combinations of harmonic overtones of C-H/O-H/N-H stretching, and the second overtones of C=O stretching
215	7609.73	Band II (8500 ~ 5500 cm-1)	The first harmonic overtones and their combinations of C-H/O-H/N-H stretching
216	5762.26	Band II (8500 ~ 5500 cm-1)	The first harmonic overtones and their combinations of C-H/O-H/N-H stretching
217	5688.98	Band II (8500 ~ 5500 cm-1)	The first harmonic overtones and their combinations of C-H/O-H/N-H stretching
218	5835.54	Band II (8500 ~ 5500 cm-1)	The first harmonic overtones and their combinations of C-H/O-H/N-H stretching
219	7008.05	Band II (8500 ~ 5500 cm-1)	The first harmonic overtones and their combinations of C-H/O-H/N-H stretching
220	7602.02	Band II (8500 ~ 5500 cm-1)	The first harmonic overtones and their combinations of C-H/O-H/N-H stretching
221	5661.98	Band II (8500 ~ 5500 cm-1)	The first harmonic overtones and their combinations of C-H/O-H/N-H stretching
222	7096.76	Band II (8500 ~ 5500 cm-1)	The first harmonic overtones and their combinations of C-H/O-H/N-H stretching
223	5037.15	Band III (5500 ~ 4000 cm-1)	The combinations of harmonic overtones of C-H/O-H/N-H stretching, and the second overtones of C=O stretching
224	6587.64	Band II (8500 ~ 5500 cm-1)	The first harmonic overtones and their combinations of C-H/O-H/N-H stretching
225	6622.35	Band II (8500 ~ 5500 cm-1)	The first harmonic overtones and their combinations of C-H/O-H/N-H stretching
226	7258.75	Band II (8500 ~ 5500 cm-1)	The first harmonic overtones and their combinations of C-H/O-H/N-H stretching
227	5858.68	Band II (8500 ~ 5500 cm-1)	The first harmonic overtones and their combinations of C-H/O-H/N-H stretching
228	5692.83	Band II (8500 ~ 5500 cm-1)	The first harmonic overtones and their combinations of C-H/O-H/N-H stretching
229	6028.39	Band II (8500 ~ 5500 cm-1)	The first harmonic overtones and their combinations of C-H/O-H/N-H stretching
230	5877.97	Band II (8500 ~ 5500 cm-1)	The first harmonic overtones and their combinations of C-H/O-H/N-H stretching
231	5118.15	Band III (5500 ~ 4000 cm-1)	The combinations of harmonic overtones of C-H/O-H/N-H stretching, and the second overtones of C=O stretching
232	7613.59	Band II (8500 ~ 5500 cm-1)	The first harmonic overtones and their combinations of C-H/O-H/N-H stretching
233	7173.9	Band II (8500 ~ 5500 cm-1)	The first harmonic overtones and their combinations of C-H/O-H/N-H stretching
234	5041.01	Band III (5500 ~ 4000 cm-1)	The combinations of harmonic overtones of C-H/O-H/N-H stretching, and the second overtones of C=O stretching
235	5526.99	Band II (8500 ~ 5500 cm-1)	The first harmonic overtones and their combinations of C-H/O-H/N-H stretching
236	6973.34	Band II (8500 ~ 5500 cm-1)	The first harmonic overtones and their combinations of C-H/O-H/N-H stretching
237	5507.7	Band II (8500 ~ 5500 cm-1)	The first harmonic overtones and their combinations of C-H/O-H/N-H stretching
238	5573.27	Band II (8500 ~ 5500 cm-1)	The first harmonic overtones and their combinations of C-H/O-H/N-H stretching
239	6379.37	Band II (8500 ~ 5500 cm-1)	The first harmonic overtones and their combinations of C-H/O-H/N-H stretching
240	5862.54	Band II (8500 ~ 5500 cm-1)	The first harmonic overtones and their combinations of C-H/O-H/N-H stretching
241	7617.44	Band II (8500 ~ 5500 cm-1)	The first harmonic overtones and their combinations of C-H/O-H/N-H stretching
242	8909.52	Band I (12500 ~ 8500 cm-1)	The second and third harmonic overtones and their combinations of C-H/O-H/N-H stretching
243	4813.45	Band III (5500 ~ 4000 cm-1)	The combinations of harmonic overtones of C-H/O-H/N-H stretching, and the second overtones of C=O stretching
244	6695.64	Band II (8500 ~ 5500 cm-1)	The first harmonic overtones and their combinations of C-H/O-H/N-H stretching
245	7235.61	Band II (8500 ~ 5500 cm-1)	The first harmonic overtones and their combinations of C-H/O-H/N-H stretching
246	6001.39	Band II (8500 ~ 5500 cm-1)	The first harmonic overtones and their combinations of C-H/O-H/N-H stretching
247	5303.28	Band III (5500 ~ 4000 cm-1)	The combinations of harmonic overtones of C-H/O-H/N-H stretching, and the second overtones of C=O stretching
248	5195.29	Band III (5500 ~ 4000 cm-1)	The combinations of harmonic overtones of C-H/O-H/N-H stretching, and the second overtones of C=O stretching
249	5874.11	Band II (8500 ~ 5500 cm-1)	The first harmonic overtones and their combinations of C-H/O-H/N-H stretching
250	7436.17	Band II (8500 ~ 5500 cm-1)	The first harmonic overtones and their combinations of C-H/O-H/N-H stretching
251	7428.45	Band II (8500 ~ 5500 cm-1)	The first harmonic overtones and their combinations of C-H/O-H/N-H stretching
252	7320.46	Band II (8500 ~ 5500 cm-1)	The first harmonic overtones and their combinations of C-H/O-H/N-H stretching
253	5866.4	Band II (8500 ~ 5500 cm-1)	The first harmonic overtones and their combinations of C-H/O-H/N-H stretching
254	8165.13	Band II (8500 ~ 5500 cm-1)	The first harmonic overtones and their combinations of C-H/O-H/N-H stretching
255	9981.74	Band I (12500 ~ 8500 cm-1)	The second and third harmonic overtones and their combinations of C-H/O-H/N-H stretching
256	5600.27	Band II (8500 ~ 5500 cm-1)	The first harmonic overtones and their combinations of C-H/O-H/N-H stretching
257	6032.24	Band II (8500 ~ 5500 cm-1)	The first harmonic overtones and their combinations of C-H/O-H/N-H stretching
258	5881.82	Band II (8500 ~ 5500 cm-1)	The first harmonic overtones and their combinations of C-H/O-H/N-H stretching
259	5179.86	Band III (5500 ~ 4000 cm-1)	The combinations of harmonic overtones of C-H/O-H/N-H stretching, and the second overtones of C=O stretching
260	8188.27	Band II (8500 ~ 5500 cm-1)	The first harmonic overtones and their combinations of C-H/O-H/N-H stretching
261	7139.18	Band II (8500 ~ 5500 cm-1)	The first harmonic overtones and their combinations of C-H/O-H/N-H stretching
262	6383.22	Band II (8500 ~ 5500 cm-1)	The first harmonic overtones and their combinations of C-H/O-H/N-H stretching
